# Supplementary material
Source: publisher figshare collection journal article supplement (https://acs.figshare.com/ndownloader/files/4533130)
Supplement: Supplementary file 1 [file 4533130]

Supporting Information for the manuscript entitled

**Cu - TiO<sub>2</sub>/Ti Dual Rotating Disk Photocatalytic (PC) Reactor: Dual Electrode Degradation Facilitated by Spontaneous Electron Transfer**

by Yunlan Xu, Yi He, Jinping Jia, Dengjie Zhong, Yalin Wang

This Supporting Information includes three pages, with two figures.

Summary: figures for color and TOC removal of 20 mg L<sup>-1</sup> RB treated by Cu-TiO<sub>2</sub>/Ti PC process under different gas conditions, UV-vis spectral changes and decolourization based on 514 nm and TOC depletion of textile plant effluent treated by Cu-TiO<sub>2</sub>/Ti PC process as a function of treatment time.

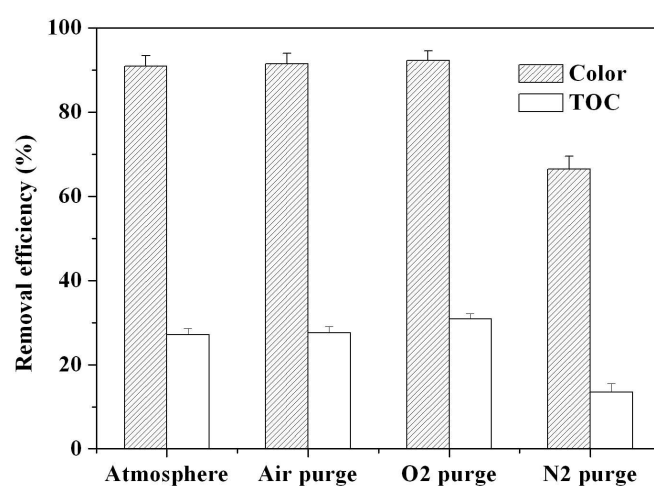

**FIGURE S1.** Color and TOC removal of 20 mg L<sup>-1</sup> RB treated by Cu-TiO<sub>2</sub>/Ti PC process under different gas conditions. Treatment condition: 0.5 g L<sup>-1</sup> Na<sub>2</sub>SO<sub>4</sub>, initial pH 2.50, disk rotation speed 90 rpm, and treatment time 20 min.

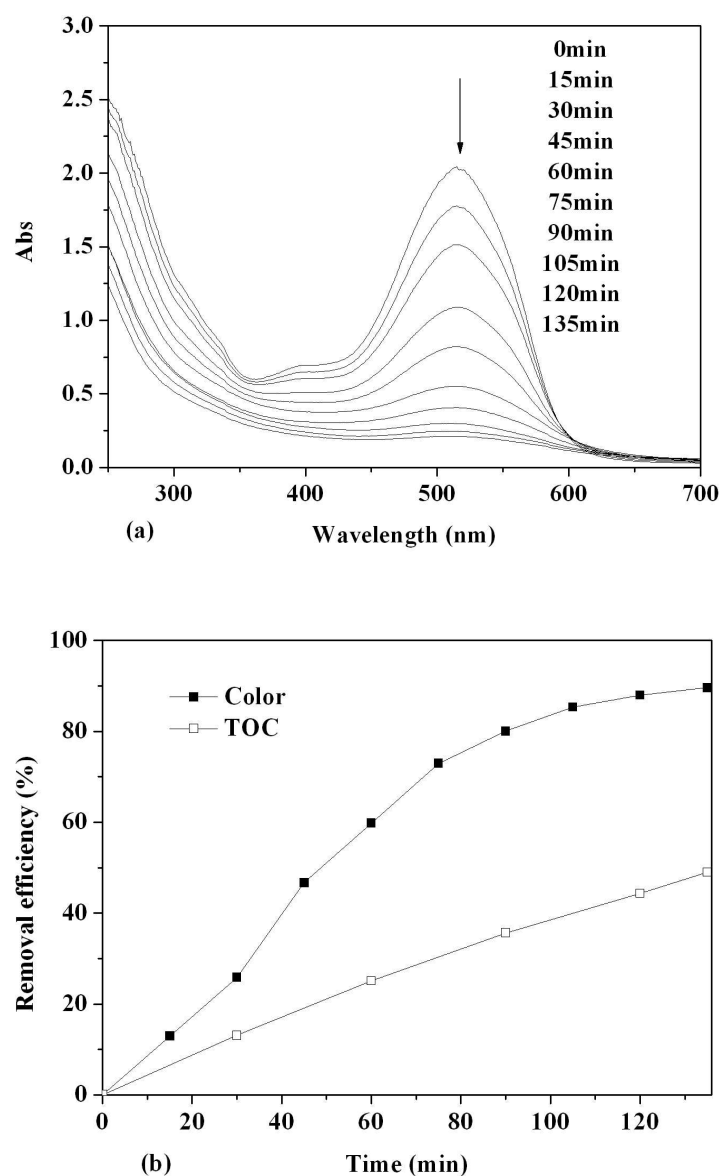

**FIGURE S2.** (a) UV-vis spectral changes and (b) decolourization based on 514 nm and TOC depletion of textile plant effluent treated by Cu-TiO<sub>2</sub>/Ti PC process as a function of treatment time. The textile plant effluent was diluted with distilled water (1:1) before UV-vis spectra analysis.
